# Supplementary material for: A Large Chinese Text Dataset in the Wild
Source: Springer Nature journal article supplement (doi:10.1007/s11390-019-1923-y), 2019-05-01
Supplement: 11390_2019_1923_MOESM1_ESM.pdf [file 11390_2019_1923_MOESM1_ESM.pdf]

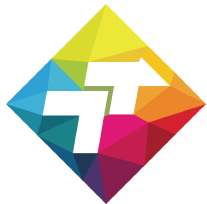

TSINGHUA UNIVERSITY - TENCENT  
JOINT LABORATORY

# A Large Chinese Text Dataset in the Wild

Tai-Ling Yuan, Zhe Zhu, Kun Xu, Cheng-Jun Li,  
Tai-Jiang Mu, and Shi-Min Hu

Yuan TL, Zhu Z, Xu K et al. A large Chinese text dataset in the wild. JOURNAL OF COMPUTER SCIENCE AND TECHNOLOGY 34(3): 509–521 May 2019. DOI 10.1007/s11390-019-1923-y

# Dataset Glance

- **32,285** high resolution images
- **1,018,402** character instances
- **3,850** character categories

□ <https://ctwdataset.github.io/>

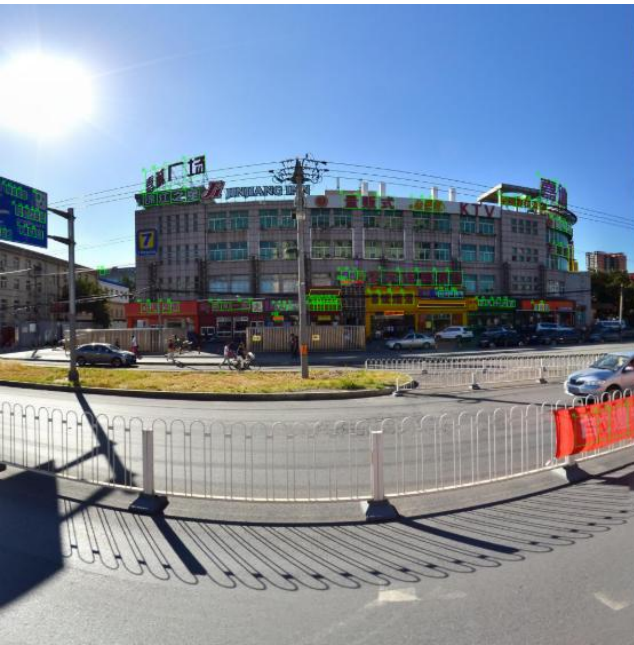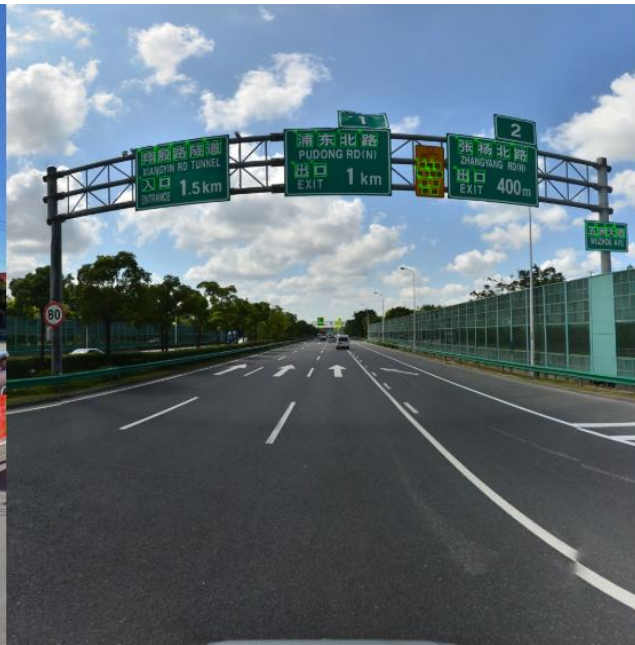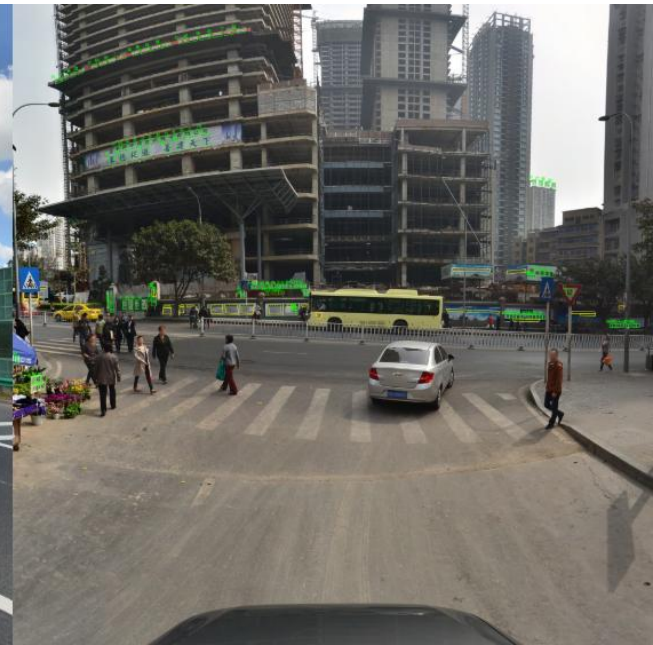



# Text Detection Task

Character detection baseline

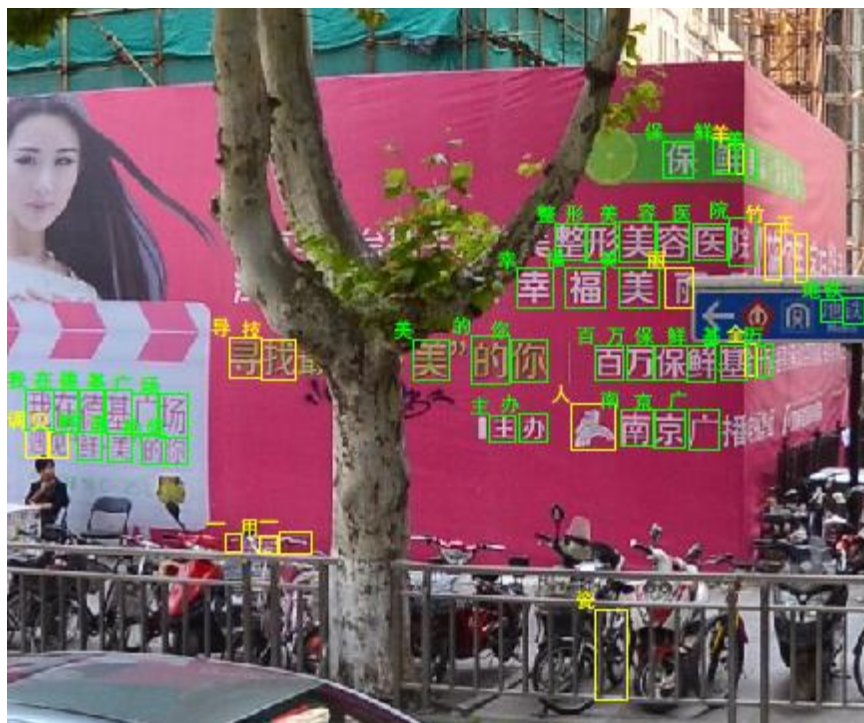

Text line detection baseline

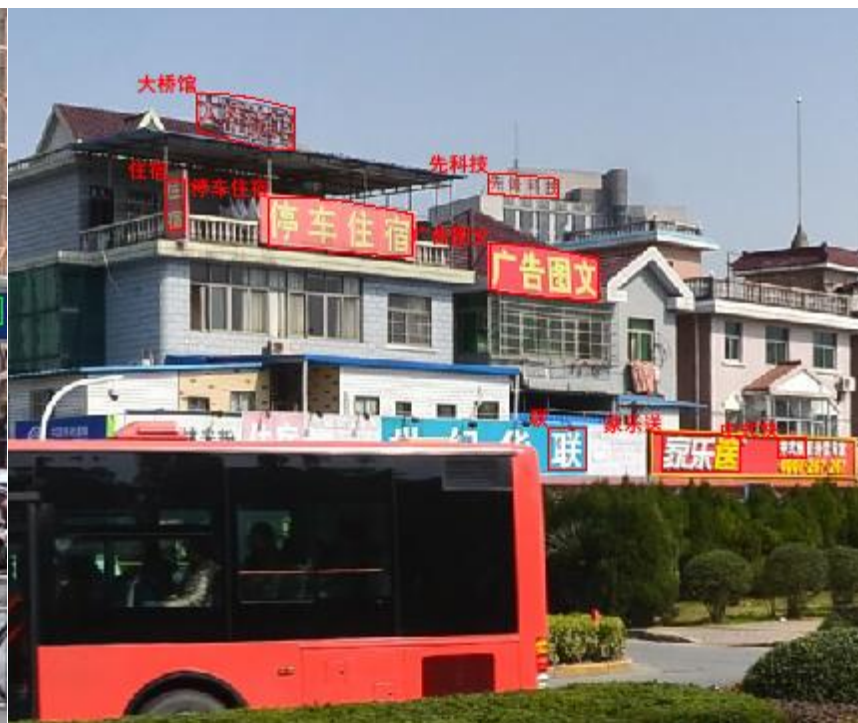

(wrong detections are shown in yellow)
